# Supplementary material for: Cardiovascular toxicity of targeted therapies for cancer: a protocol for an overview of systematic reviews
Source: PubMed Central journal article supplement — BMJ Open. 2018 Jun 27;8(6):e021064. doi: 10.1136/bmjopen-2017-021064 (PMC6042572; doi:10.1136/bmjopen-2017-021064), 2018-06-27
Supplement: bmjopen-2017-021064.draft_revisions.pdf [file bmjopen-2017-021064.draft_revisions.pdf]

# BMJ Open

BMJ Open is committed to open peer review. As part of this commitment we make the peer review history of every article we publish publicly available.

When an article is published we post the peer reviewers' comments and the authors' responses online. We also post the versions of the paper that were used during peer review. These are the versions that the peer review comments apply to.

The versions of the paper that follow are the versions that were submitted during the peer review process. They are not the versions of record or the final published versions. They should not be cited or distributed as the published version of this manuscript.

BMJ Open is an open access journal and the full, final, typeset and author-corrected version of record of the manuscript is available on our site with no access controls, subscription charges or pay-per-view fees (<http://bmjopen.bmj.com>).

If you have any questions on BMJ Open's open peer review process please email [info.bmjopen@bmj.com](mailto:info.bmjopen@bmj.com)

# BMJ Open

## Cardiovascular toxicity of targeted therapies for cancer: a protocol for an overview of systematic reviews

|                               |                                                                                                                                                                                                                                                                                                                                                                                                                                                                                                                                                                                                                                                                                                                         |
|-------------------------------|-------------------------------------------------------------------------------------------------------------------------------------------------------------------------------------------------------------------------------------------------------------------------------------------------------------------------------------------------------------------------------------------------------------------------------------------------------------------------------------------------------------------------------------------------------------------------------------------------------------------------------------------------------------------------------------------------------------------------|
| Journal:                      | <i>BMJ Open</i>                                                                                                                                                                                                                                                                                                                                                                                                                                                                                                                                                                                                                                                                                                         |
| Manuscript ID                 | bmjopen-2017-021064                                                                                                                                                                                                                                                                                                                                                                                                                                                                                                                                                                                                                                                                                                     |
| Article Type:                 | Protocol                                                                                                                                                                                                                                                                                                                                                                                                                                                                                                                                                                                                                                                                                                                |
| Date Submitted by the Author: | 08-Dec-2017                                                                                                                                                                                                                                                                                                                                                                                                                                                                                                                                                                                                                                                                                                             |
| Complete List of Authors:     | <p>van Leeuwen, Marina; University of New South Wales, Centre for Big Data Research in Health</p> <p>Luu, Steven; University of New South Wales - Randwick Campus, Centre for Big Data Research in Health</p> <p>Gurney, Howard; Macquarie University, Faculty of Medicine and Health Sciences</p> <p>Brown, Martin; Macquarie University Faculty of Medicine and Health Sciences</p> <p>Webber, Kate; University of New South Wales - Randwick Campus, Prince of Wales Clinical School</p> <p>Pearson, Sallie-Anne; University of New South Wales, Medicines Policy Research Unit</p> <p>Hunt, Lee; Cancer Voices NSW</p> <p>Vajdic, Claire; University of New South Wales, Centre for Big Data Research in Health</p> |
| Keywords:                     | Overview, Systematic review, Cancer, Targeted therapy, Antineoplastic agent, Cardiovascular toxicity                                                                                                                                                                                                                                                                                                                                                                                                                                                                                                                                                                                                                    |
|                               |                                                                                                                                                                                                                                                                                                                                                                                                                                                                                                                                                                                                                                                                                                                         |

SCHOLARONE™  
Manuscripts

1  
2  
3  
4 **Cardiovascular toxicity of targeted therapies for cancer: a protocol for an overview of**  
5  
6 **systematic reviews**  
7

8  
9 Marina T. van Leeuwen<sup>1</sup>, Steven Luu<sup>1</sup>, Howard Gurney<sup>2</sup>, Martin R. Brown<sup>2</sup>, Kate Webber<sup>3,4</sup>,  
10  
11 Sallie-Anne Pearson<sup>1</sup>, Lee Hunt<sup>5</sup>, Claire M. Vajdic<sup>1</sup>  
12

13  
14 <sup>1</sup> Centre for Big Data Research in Health, University of New South Wales, Sydney, NSW,  
15  
16 2052, Australia.  
17

18  
19 <sup>2</sup> Faculty of Medicine and Health Science, Macquarie University, Sydney, NSW, 2109,  
20  
21 Australia.  
22

23  
24 <sup>3</sup> Department of Medical Oncology, Prince of Wales Hospital and Royal Hospital for  
25  
26 Women, Randwick, NSW, 2031, Australia.  
27

28  
29  
30 <sup>4</sup> Prince of Wales Clinical School, University of New South Wales, Sydney, 2052, Australia.  
31

32  
33 <sup>5</sup> Cancer Voices NSW, Australia.  
34

35  
36 Corresponding author: Claire M. Vajdic, Centre for Big Data Research in Health, University  
37  
38 of New South Wales, Sydney, 2052, Australia; Phone +61 2 9385 1424; Fax +61 9385 3880;  
39  
40 Email [claire.vajdic@unsw.edu.au](mailto:claire.vajdic@unsw.edu.au)  
41

42  
43  
44 Abstract (max 300): 300  
45

46  
47 Body (max 4,000): 2,006 (Rationale, Objectives, Methods, Discussion)  
48

49  
50 **Keywords:** Overview, systematic review, cancer, targeted therapy, antineoplastic agent,  
51  
52 cardiovascular toxicity  
53

## ABSTRACT

**Introduction:** The introduction of targeted therapies for cancer has contributed to dramatic improvements in patient survival. Nevertheless, several targeted therapies have been associated with ‘off-target’ adverse effects, such as cardiotoxicity, based on varying levels of evidence. To-date, this evidence has not been systematically synthesised. We will therefore synthesise published systematic review evidence of cardiovascular toxicity associated with targeted cancer therapies.

**Methods and analysis:** We will include systematic reviews of randomised controlled trials and observational studies that report on cardiovascular outcomes for individual agents. We will identify systematic reviews by applying a pre-developed, standardised search strategy executed across multiple databases. Two independent reviewers will identify reviews contingent upon pre-defined eligibility criteria. They will resolve ambiguous cases by reaching a consensus, arbitrated by a third reviewer if required. The reviewers will extract and report data according to methodological guidelines for overviews provided by the Cochrane Collaboration, Joanna Briggs Institute and the Preferred Reporting Items for Systematic Reviews and Meta-Analysis Protocols (PRISMA-P). They will assess the quality of included reviews by applying the Assessment of Multiple Systematic Reviews (AMSTAR) tool. They will judge the quality of evidence in included reviews based on their assessment of bias and incorporation into the interpretation of findings. In synthesising the evidence, we will classify agents based on systematic review evidence of toxicity (sufficient, probable, possible, or indeterminate), for specific cardiovascular outcomes (congestive heart failure, myocardial infarction, ischemic heart disease, left ventricular ejection fraction decline, cerebrovascular disease, pulmonary embolism, thrombosis and hypertension). This will provide clinicians and patients with an accessible synthesis based on robust methodology.

1  
2  
3 **Ethics and dissemination:** Ethics approval is not required for overviews. We will conduct  
4 the study in collaboration with consumer representatives. We will submit results for peer-  
5 review publication, and disseminate them through established clinical and consumer  
6 networks.  
7  
8  
9

10  
11  
12 **Systematic review registration:** PROSPERO number CRD42017080014.  
13

## 14 **STRENGTHS AND LIMITATIONS OF THIS STUDY**

- 15  
16  
17  
18 - We will apply best-practice methodology in order to classify the cardiovascular  
19 toxicity of targeted therapies based on systematic-review evidence.  
20  
21
- 22  
23  
24 - Restriction to systematic reviews excludes newer agents for which systematic reviews  
25 have not yet been performed.  
26  
27
- 28  
29 - Heterogeneity in systematic reviews, together with variable quality and completeness,  
30 prevents a quantitative synthesis of the evidence.  
31  
32
- 33  
34 - Systematic review evidence has been almost exclusively generated from RCT  
35 populations that are younger and healthier than the average, newly diagnosed cancer  
36 patient.  
37  
38
- 39  
40 - Short follow-up of the underlying RCTs may underestimate longer term  
41 cardiovascular toxicity.  
42  
43  
44  
45  
46  
47  
48  
49  
50  
51  
52  
53  
54  
55  
56  
57  
58  
59  
60

## RATIONALE

Cancer treatment has evolved considerably over the past two decades. The introduction of targeted therapies, including small molecule inhibitors, monoclonal antibodies, hormone therapies and immunotherapies, has contributed to dramatic improvements in patient survival. Paradoxically, evidence is accumulating that some of these agents are associated with a number of off-target adverse effects, including short- and longer-term cardiovascular toxicity. These include, but are not limited to left-ventricular ejection fraction (LVEF) decline, congestive heart failure (CHF), infarction, ischemia, arrhythmias, stroke, thromboembolism and hypertension.<sup>1-3</sup> The pathogenesis of cardiovascular toxicity associated with established chemotherapeutic agents, such as anthracyclines, has been well-described, whereas that for targeted therapies is less well understood. Moreover, there are no universally accepted evidence-based guidelines for monitoring or managing potential cardiovascular toxicity in patients exposed to these agents.<sup>4 5</sup>

*Overviews* of systematic reviews (also called *umbrella reviews*) compile information from multiple systematic reviews to provide a comprehensive synthesis of evidence.<sup>6</sup>

Additionally, overviews of systematic reviews may provide a wider perspective on the heterogeneity, possible sources of bias and methodological quality of systematic reviews that may affect the credibility of evidence in a field.<sup>7</sup> There are no prior systematically conducted overviews of the cardiovascular toxicity of targeted cancer therapies. This overview will provide a comprehensive, accessible synthesis with which to inform clinicians in general practice and oncology when managing the cardiovascular health of cancer patients.

## OBJECTIVES

We will synthesise published systematic review evidence of cardiovascular toxicity associated with targeted cancer therapies. For each agent for which there is systematic review evidence, cardiovascular toxicity will be classified as sufficient, probable, possible or indeterminate.

## METHODS AND ANALYSIS

### Protocol and registration

This protocol was designed in accordance with the methodological guidelines for overviews provided by the Cochrane Collaboration,<sup>6</sup> the Joanna Briggs Institute,<sup>8</sup> and the Preferred Reporting Items for Systematic Reviews and Meta-Analysis Protocols (PRISMA-P; checklist provided).<sup>9</sup> It is registered on the International Prospective Register of Systematic Reviews (PROSPERO # CRD42017080014 ; <http://www.crd.york.ac.uk/prospero>).<sup>10 11</sup>

### Eligibility criteria

#### Types of studies

We will include published, peer-reviewed systematic reviews and meta-analyses of Phase II-III randomised controlled trials (RCTs) and observational cohort studies of targeted therapies for cancer which provide meta-estimates for cardiovascular outcomes. We will not include systematic reviews published only in abstract form, nor network meta-analyses. We will include pooled analyses if the study was a systematic review, and collected individual-level data from all eligible studies.

#### Population

1  
2  
3 We will limit our overview to studies of human cancer patients and will exclude treatment for  
4 other indications. We will not restrict studies by cancer type, patient age or gender.  
5  
6

## 7 8 Interventions 9

10  
11 Our definition of targeted therapies will include: small molecule inhibitors (protein kinase,  
12 proteasome and other small molecule inhibitors); monoclonal antibodies; hormone  
13 (endocrine) therapies; and immunotherapies included within the L01X, L02B and L04AX  
14 rubrics of the World Health Organisation (WHO) Anatomical Therapeutic Chemical (ATC)  
15 classification. This system classifies agents according to the primary therapeutic use of the  
16 main active ingredient.<sup>12</sup> We will not include sensitizers used in photodynamic/radiation  
17 therapy (photodynamic agents). We will include agents administered in both neoadjuvant and  
18 adjuvant settings. We will restrict, where possible, to studies of patients undergoing first-line  
19 therapy; we will exclude studies solely examining second-line therapy  
20  
21  
22  
23  
24  
25  
26  
27  
28  
29  
30

## 31 Comparison 32

33  
34 We will limit our overview to systematic reviews that compare the agent of interest to  
35 placebo, with or without concurrent chemotherapy, radiotherapy, surgery, or transplantation.  
36  
37 We will exclude systematic reviews with one or more studies in which the agent of interest  
38 was directly compared to standard therapy, or in which the agent of interest was given in both  
39 the treatment and control arm.  
40  
41  
42  
43  
44  
45

## 46 Outcomes 47

48  
49 We will include systematic reviews reporting meta-estimates for at least one cardiovascular  
50 outcome. We will consider all relevant diseases of the cardiovascular system, as defined  
51 according to the WHO International Classification of Diseases 10<sup>th</sup> Revision (ICD10)<sup>13</sup> (ICD-  
52 10 codes I10-I99), including, but not limited to: CHF, myocardial infarction, ischaemic heart  
53  
54  
55  
56  
57  
58  
59  
60



1  
2  
3 disease, LVEF decline, cerebrovascular disease, pulmonary embolism, thrombosis and  
4  
5 hypertension. We will not include haematological toxicities such as thrombocytopenia.  
6  
7

### 8 **Information sources and search strategy**

9

10  
11 We will conduct an exhaustive literature search across two biomedical citation databases,  
12  
13 Embase and Medline, as well as the Cochrane Database of Systematic Reviews. Our  
14  
15 proposed search strategy is based on predefined systematic review search filters provided by  
16  
17 the BMJ Evidence Centre<sup>14</sup> and was developed with the aid of an experienced research  
18  
19 librarian. Search terms comprise keywords related to cancer, drug therapy, adverse events,  
20  
21 toxicity, systematic reviews, and meta-analyses. We will adapt the search strategy for each  
22  
23 database (see Supplementary File 1). English language articles published up until December  
24  
25 2016 will be eligible. We will identify any additional reviews by searching reference lists.  
26  
27

### 28 **Data collection**

29

30  
31  
32 We will manage identified studies using EndNote X8.0.1 [Thomson Reuters 2016]. After  
33  
34 initial duplicate removal, two reviewers (SL and CV) will independently screen titles and  
35  
36 abstracts against eligibility criteria. They will retrieve studies that are potentially relevant in  
37  
38 full-text format and will again check them against eligibility criteria to determine inclusion.  
39  
40 They will resolve discrepancies in included studies through discussion and consultation with  
41  
42 a third reviewer (MvL) if consensus cannot be reached. They will summarise search results  
43  
44 using a PRISMA flow diagram.<sup>15</sup>  
45  
46

47  
48 Two reviewers (SL, CV) will independently extract data from each included study using a  
49  
50 predefined data extraction form, resolving discrepancies through discussion and consultation  
51  
52 with a third reviewer (MvL) if consensus cannot be reached. They will pilot this form and  
53  
54 refine accordingly. Where data reported within systematic reviews are inconsistent, they will  
55  
56  
57  
58  
59  
60

1  
2  
3 contact the authors directly for clarification; they will exclude systematic reviews with data  
4  
5 irregularities that cannot be resolved by communication with the authors.  
6  
7

8 The reviewers will extract the following data items from each included study:  
9

- 10  
11 (1) Bibliographic details (author, publication year);  
12  
13  
14 (2) Methodological characteristics (information sources, search end date, study design  
15  
16 and aim, eligibility criteria, publication date range of included studies, agent and dose,  
17  
18 intervention, defined cardiovascular outcome including grade [severity], length of  
19  
20 follow-up, method of pooling and bias assessment, funding);  
21  
22  
23 (3) Patient characteristics (age, sex, cancer or tumour type, prophylaxis);  
24  
25  
26  
27 (4) Results (number of studies included in meta-estimate, event rate in exposed and  
28  
29 unexposed trial arms or patient populations, meta-estimate, risk of bias within  
30  
31 included studies, risk of bias in meta-estimate);  
32  
33

### 34 **Assessment of methodological quality of included reviews**

35  
36  
37 Two reviewers (SL, CV) will independently appraise the methodological quality of included  
38  
39 reviews using AMSTAR,<sup>16 17</sup> a validated and reliable tool.<sup>18</sup> They will resolve discrepancies  
40  
41 in AMSTAR scores through discussion and consultation with a third reviewer (MvL) if  
42  
43 consensus cannot be reached. They will not exclude studies based on their AMSTAR score;  
44  
45 however, we will use AMSTAR scores when preparing our evidence synthesis to select the  
46  
47 higher-quality study from completely overlapping systematic reviews, rather than double-  
48  
49 counting events and participants from primary studies (see 'Data Synthesis').  
50  
51  
52

### 53 **Assessment of quality of evidence**

1  
2  
3 There is no agreed method with which to evaluate the quality of evidence across systematic  
4 reviews.<sup>19</sup> The GRADE system, as applied in Cochrane reviews,<sup>6</sup> to assess the quality of  
5 evidence and strength of recommendations cannot be readily applied in overviews of  
6 systematic reviews.<sup>19 20</sup> Additionally, given the scope of this overview, it is not feasible to  
7 judge the quality of every primary study included in each systematic review. Nevertheless,  
8 the strict criteria on which we will base our synthesis will ensure that only those systematic  
9 reviews with detailed reporting on the quality of primary studies contribute to the evidence  
10 (see 'Data Synthesis').<sup>19</sup>

### 21 **Data synthesis**

22  
23  
24 We will consider the issue of overlapping primary studies prior to preparing our evidence  
25 synthesis. If there are multiple systematic reviews of the same agent in the same patient  
26 population, and for the same outcome, we will apply the following:

- 31 - if the primary studies are completely overlapping, then we will select the highest  
32 quality review;
- 33  
34 - if the primary studies partially overlap, then we will retain both reviews if the lower-  
35 quality review consists of more than one-third new studies;
- 36  
37 - if the primary studies do not overlap, then we will retain both reviews.
- 38  
39  
40  
41  
42  
43

44  
45 We will denote systematic reviews containing overlapping primary studies using appropriate  
46 footnotes; likewise, we will note systematic reviews removed from our evidence synthesis  
47 due to completely overlapping studies.

48  
49  
50  
51  
52 We will use forest plots to display published meta-estimates for each agent and  
53 cardiovascular outcome; however, we will not compute an overview meta-estimate due the  
54  
55  
56  
57  
58  
59

1  
2  
3 likelihood of considerable heterogeneity in study populations and cardiovascular outcomes  
4  
5 between studies, the absence of essential meta-data (number of events, number of exposed  
6  
7 and unexposed patients), and the lack of well-established quantification methods.<sup>18</sup>  
8  
9

10 We will present the findings as a narrative synthesis,<sup>21</sup> and will use a ‘stop-light indicator’<sup>8</sup>  
11  
12 for visualisation. For each cardiovascular outcome, we will classify individual agents into  
13  
14 one of five categories based on the ‘worst-case’ scenario across published reviews by  
15  
16 applying the criteria described in Table 1. We will classify agents as having sufficient (red),  
17  
18 probable (orange), or possible (yellow) evidence of toxicity, sufficient evidence of no toxicity  
19  
20 (white), or indeterminate (grey) evidence of toxicity. We will consider evidence to be  
21  
22 sufficient if a systematic review is of high quality, assesses the quality of the primary studies,  
23  
24 and identifies a statistically significant association based on at least 1,000 exposed patients.<sup>22</sup>  
25  
26

27 <sup>23</sup> For each cardiovascular outcome, sufficient systematic review evidence of cardiovascular  
28  
29 toxicity will supersede any other classification.  
30  
31  
32  
33  
34  
35  
36  
37  
38  
39  
40  
41  
42  
43  
44  
45  
46  
47  
48  
49  
50  
51  
52  
53  
54  
55  
56  
57  
58  
59  
60

**Table 1. Classification used to synthesise evidence from systematic reviews of targeted cancer therapies and cardiovascular toxicity**

| Classification for each cardiovascular event            | Conditions                                                                                                                                                                                                                                                                                                                                                      |
|---------------------------------------------------------|-----------------------------------------------------------------------------------------------------------------------------------------------------------------------------------------------------------------------------------------------------------------------------------------------------------------------------------------------------------------|
| Sufficient systematic review evidence of toxicity       | If the following were <i>all</i> met:<br>(i) a statistically significant meta-estimate of effect ( $p < 0.05$ );<br>(ii) the review was either high quality (AMSTAR score $\geq 8$ ) or moderate quality (AMSTAR score 4-7), provided that the AMSTAR elements 7 and 8 were met*; AND<br>(iii) the number of patients exposed to the agent was $\geq 1000$ .    |
| Probable systematic review evidence of toxicity         | If the following are <i>all</i> met:<br>(i) a statistically significant meta-estimate of effect ( $p < 0.05$ );<br>(ii) the review was either high quality (AMSTAR score $\geq 8$ ) or moderate quality (AMSTAR score 4-7), provided that the AMSTAR elements 7 and 8 were met*; AND<br>(iii) the number of patients exposed to the agent was $< 1000$ .        |
| Probable systematic review evidence of toxicity         | If the following are <i>all</i> met:<br>(i) a statistically significant meta-estimate of effect ( $p < 0.05$ );<br>(ii) the review was moderate quality (AMSTAR score 4-7), without satisfying AMSTAR elements 7 or 8*, or of low quality (AMSTAR score $\leq 3$ ); AND<br>(iii) the number of patients exposed to the agent was $\geq 1000$ .                  |
| Possible systematic review evidence of toxicity         | If the following are <i>all</i> met:<br>(i) a statistically significant meta-estimate of effect ( $p < 0.05$ );<br>(ii) review was either moderate quality (AMSTAR score 4-7), without satisfying AMSTAR elements 7 or 8*, or low quality (AMSTAR score $\leq 3$ ); AND<br>(iii) the number of patients exposed to the agent was $< 1000$ .                     |
| Sufficient systematic review evidence of no toxicity    | If the following are <i>all</i> met:<br>(i) a statistically non-significant meta-estimate of effect ( $p > 0.05$ );<br>(ii) the review was either high quality (AMSTAR score $\geq 8$ ) or moderate quality (AMSTAR score 4-7), provided that the AMSTAR elements 7 and 8 were met*; AND<br>(iii) the number of patients exposed to the agent was $\geq 1000$ . |
| Indeterminate systematic review evidence of no toxicity | If the following are <i>all</i> met:<br>(i) a statistically non-significant meta-estimate of effect ( $p > 0.05$ );<br>(ii) the review was either high quality (AMSTAR score $\geq 8$ ) or moderate quality (AMSTAR score 4-7), provided that the AMSTAR elements 7 & 8 were met*; AND<br>(iii) the number of patients exposed to the agent was $< 1000$ .      |
| Indeterminate systematic review evidence of no toxicity | If the following are <i>all</i> met:<br>(i) a statistically non-significant meta-estimate of effect ( $p > 0.05$ );<br>(ii) the review was moderate quality (AMSTAR score 4-7), without satisfying both AMSTAR elements 7 and 8*, or low quality (AMSTAR score $\leq 3$ ); AND                                                                                  |

---

(iii) the number of patients exposed to the agent was of any size.

---

Indeterminate systematic review evidence of toxicity If the only study examining the cardiovascular outcome did not report the number of patients exposed to the agent, regardless of effect or study quality.

---

\* AMSTAR elements 7 and 8: quality of included studies was assessed, documented and used appropriately in formulating inclusions

## ETHICS AND DISSEMINATION

Ethics approval is not required for overviews as they are based on published documents. We will conduct the study in collaboration with consumer representatives. We will submit our findings for peer-review publication and presentation at national and international conferences. We will also disseminate our findings through established clinical networks, as well as consumer networks, using lay summaries where appropriate.

## DISCUSSION

This will be the first systematically conducted overview of cardiovascular toxicity associated with targeted cancer therapies. We will use robust methodology to rigorously appraise and comprehensively synthesise published systematic review evidence. Hierarchically, systematic reviews generally provide the highest level of evidence for harms associated with treatment.<sup>24</sup>

However, overviews of systematic reviews present several methodological challenges that should be considered.<sup>18 19 25</sup> Firstly, using data more than once from individual primary studies without accounting for overlap may result in some primary studies being overrepresented. As recommended, we will apply *a priori* criteria to select systematic reviews when there are multiple potential candidates.<sup>21</sup>

Secondly, it is not feasible within this study to extract and assess risk of bias at the level of each individual primary study. Rather, our evidence synthesis will incorporate the quality of systematic reviews, the number of patients exposed, whether the quality of the primary studies was assessed, and the consistency of the evidence. These strict criteria will ensure that

1  
2  
3 low-quality systematic reviews that fail to assess or take into account the quality of the  
4 primary studies provide no more than indeterminate evidence in our synthesis.<sup>19,26</sup>  
5  
6  
7

8 Thirdly, due to heterogeneity between systematic reviews in terms of outcomes and  
9 definitions, population characteristics, and study type and quality, a quantitative synthesis of  
10 the evidence is not possible.  
11  
12  
13

14  
15 Fourthly, restriction to published systematic reviews precludes inclusion of emerging  
16 evidence, and there is no agreed method for including additional primary studies.<sup>27</sup> Hence,  
17 we are unable to include in our synthesis evidence for those agents for which systematic  
18 reviews are yet to be conducted, and it will be inherently biased towards the more established  
19 agents.  
20  
21  
22  
23  
24  
25

26  
27 Finally, despite our intention to include observational studies, evidence which is  
28 predominantly generated from RCTs may underestimate cardiovascular toxicity, as trial  
29 participants will be younger and healthier than the average cancer patient, and follow-up time  
30 may be insufficient to observe late effects. They are also unlikely to report detailed  
31 information on cardiovascular prophylaxis, such as use of angiotensin-converting enzyme  
32 (ACE) inhibitors, angiotensin receptor blockers and beta-blockers, which are known to  
33 modify cardiovascular toxicity.<sup>14</sup>  
34  
35  
36  
37  
38  
39  
40  
41  
42

43 Our evidence synthesis will provide new commentary on the current systematic review  
44 evidence for cardiovascular toxicity associated with individual targeted cancer therapies. It  
45 will provide an accessible, comprehensive synthesis with which to inform clinicians and the  
46 development of guidelines for the management of at-risk patients. Furthermore, it is expected  
47 that this overview will encourage further research for those agents for which systematic  
48 review evidence is currently insufficient or lacking.  
49  
50  
51  
52  
53  
54  
55  
56  
57  
58  
59  
60

## ACKNOWLEDGEMENTS

We would like to acknowledge Monica O'Brien, Academic Services Librarian, University of New South Wales, for her assistance with the proposed search strategy.

## AUTHOR CONTRIBUTIONS

CV is the guarantor. MvL, SL, and CV drafted the protocol. All authors have made substantive intellectual contributions to the development of this protocol. MvL, SL, and CV developed the search strategy. HG, KW, and S-AP provided expertise on targeted therapies and MB on cardiovascular toxicity. LH contributed to the development of the stop-light indicator. All authors read, provided feedback and approved the final manuscript.

## FUNDING

MvL is supported by a Postdoctoral Fellowship from the National Health and Medical Research Council (#1012141). This research received no specific grant from any funding agency in the public, commercial or not-for-profit sectors.

## COMPETING INTERESTS

The authors declare that they have no competing interests.



**REFERENCES**

1. Ewer MS, Ewer SM. Cardiotoxicity of anticancer treatments. *Nat Rev Cardiol* 2015;12(9):547-58. doi: 10.1038/nrcardio.2015.65 [published Online First: 2015/05/13]
2. Herrmann J, Yang EH, Iliescu CA, et al. Vascular toxicities of cancer therapies: the old and the new - an evolving avenue. *Circulation* 2016;133(13):1272-89. doi: 10.1161/CIRCULATIONAHA.115.018347 [published Online First: 2016/03/30]
3. Moslehi JJ. Cardiovascular Toxic Effects of Targeted Cancer Therapies. *N Engl J Med* 2016;375(15):1457-67. doi: 10.1056/NEJMra1100265 [published Online First: 2016/10/13]
4. O'Hare M, Murphy K, Mookadam F, et al. Cardio-oncology Part II: the monitoring, prevention, detection and treatment of chemotherapeutic cardiac toxicity. *Expert Rev Cardiovasc Ther* 2015;13(5):519-27. doi: 10.1586/14779072.2015.1027686 [published Online First: 2015/04/14]
5. Hamo CE, Bloom MW, Cardinale D, et al. Cancer therapy-related cardiac dysfunction and heart failure: Part 2: prevention, treatment, guidelines, and future directions. *Circ Heart Fail* 2016;9(2):e002843. doi: 10.1161/CIRCHEARTFAILURE.115.002843 [published Online First: 2016/02/04]
6. Becker LA, Oxman AD. Chapter 22: Overviews of reviews. In: Higgins J, Green S, eds. *Cochrane Handbook for Systematic Reviews of Interventions Version 5.1.0* [updated March 2011] The Cochrane Collaboration: The Cochrane Collaboration: , 2011.
7. Ioannidis J. Next-generation systematic reviews: prospective meta-analysis, individual-level data, networks and umbrella reviews. *Br J Sports Med* 2017;51(20):1456-58. doi: 10.1136/bjsports-2017-097621 [published Online First: 2017/02/23]

- 1  
2  
3 8. Aromataris E, Fernandez R, Godfrey CM, et al. Summarizing systematic reviews:  
4 methodological development, conduct and reporting of an umbrella review approach.  
5 International Journal of Evidence-Based Healthcare 2015;13(3):132-40. doi:  
6  
7 10.1097/xeb.000000000000055  
8  
9  
10  
11  
12 9. Shamseer L, Moher D, Clarke M, et al. Preferred reporting items for systematic review and  
13 meta-analysis protocols (PRISMA-P) 2015: elaboration and explanation. BMJ 2015;350 doi:  
14 10.1136/bmj.g7647  
15  
16  
17  
18  
19 10. Booth A, Clarke M, Dooley G, et al. The nuts and bolts of PROSPERO: an international  
20 prospective register of systematic reviews. Syst Rev 2012;1(1):2. doi: 10.1186/2046-4053-1-  
21 2  
22  
23  
24  
25  
26  
27 11. Booth A, Clarke M, Ghersi D, et al. An international registry of systematic-review  
28 protocols. Lancet 2011;377(9760):108-9. doi: 10.1016/S0140-6736(10)60903-8  
29  
30  
31  
32 12. World Health Organisation (WHO) Collaborating Centre for Drug Statistics and  
33 Methodology. Guidelines for ATC classification and DDD assignment, 2017 Oslo,  
34 Norway.2016 [Available from:  
35 [https://www.whocc.no/filearchive/publications/2017\\_guidelines\\_web.pdf](https://www.whocc.no/filearchive/publications/2017_guidelines_web.pdf) accessed 12  
36  
37  
38  
39  
40  
41  
42  
43  
44 13. World Health Organization (WHO). International Statistical Classification of Diseases  
45 and Related Health Problems, 10th Revision (online) Geneva: World Health Organization;  
46 2016 [Available from: <http://apps.who.int/classifications/icd10/browse/2016/en/#/> accessed 12  
47  
48  
49  
50  
51  
52  
53  
54 14. BMJ Evidence Centre. BMJ Clinical Evidence: Systematic Review Search Filter  
55 resource. [undated] [Available from:  
56  
57  
58  
59  
60

1  
2  
3 [http://clinicalevidence.bmj.com/x/set/static/ebm/learn/665076.html?locale=en\\_AU](http://clinicalevidence.bmj.com/x/set/static/ebm/learn/665076.html?locale=en_AU) accessed  
4  
5 12 September 2017.

6  
7  
8 15. Moher D, Liberati A, Tetzlaff J, et al. Preferred reporting items for systematic reviews  
9  
10 and meta-analyses: the PRISMA statement. *BMJ* 2009;339:b2535. doi: 10.1136/bmj.b2535

11  
12  
13 16. Shea BJ, Hamel C, Wells GA, et al. AMSTAR is a reliable and valid measurement tool to  
14  
15 assess the methodological quality of systematic reviews. *J Clin Epidemiol* 2009;62(10):1013-  
16  
17 20. doi: <http://dx.doi.org/10.1016/j.jclinepi.2008.10.009>

18  
19  
20 17. Shea BJ, Grimshaw JM, Wells GA, et al. Development of AMSTAR: a measurement tool  
21  
22 to assess the methodological quality of systematic reviews. *BMC Med Res Methodol*  
23  
24 2007;7(1):10. doi: 10.1186/1471-2288-7-10

25  
26  
27 18. Pieper D, Buechter R, Jerinic P, et al. Overviews of reviews often have limited rigor: a  
28  
29 systematic review. *J Clin Epidemiol* 2012;65(12):1267-73. doi:  
30  
31 10.1016/j.jclinepi.2012.06.015

32  
33  
34 19. Ballard M, Montgomery P. Risk of bias in overviews of reviews: a scoping review of  
35  
36 methodological guidance and four-item checklist. *Res Synth Methods* 2017;8(1):92-108. doi:  
37  
38 10.1002/jrsm.1229

39  
40  
41 20. Pollock A, Campbell P, Brunton G, et al. Selecting and implementing overview methods:  
42  
43 implications from five exemplar overviews. *Syst Rev* 2017;6(1):145. doi: 10.1186/s13643-  
44  
45 017-0534-3

46  
47  
48 21. Cochrane Comparing Multiple Interventions Methods Group (CMIMG). Review type and  
49  
50 methodological considerations- background paper for the first part of the Paris CMIMG  
51  
52 Discussion 2012 [Available from:

1  
2  
3 [http://methods.cochrane.org/sites/methods.cochrane.org.cmi/files/public/uploads/Review%20](http://methods.cochrane.org/sites/methods.cochrane.org.cmi/files/public/uploads/Review%20type%20and%20methods%20for%20comparing%20multiple%20interventions_12APR12.pdf)  
4 [type%20and%20methods%20for%20comparing%20multiple%20interventions\\_12APR12.pdf](http://methods.cochrane.org/sites/methods.cochrane.org.cmi/files/public/uploads/Review%20type%20and%20methods%20for%20comparing%20multiple%20interventions_12APR12.pdf)  
5  
6 accessed 17 October 2017.  
7  
8

9  
10 22. Bellou V, Belbasis L, Tzoulaki I, et al. Environmental risk factors and Parkinson's  
11 disease: An umbrella review of meta-analyses. *Parkinsonism Relat Disord* 2016;23:1-9. doi:  
12 10.1016/j.parkreldis.2015.12.008 [published Online First: 2016/01/08]  
13  
14

15  
16 23. Belbasis L, Bellou V, Evangelou E, et al. Environmental risk factors and multiple  
17 sclerosis: an umbrella review of systematic reviews and meta-analyses. *Lancet Neurol*  
18 2015;14(3):263-73. doi: 10.1016/S1474-4422(14)70267-4 [published Online First:  
19 2015/02/11]  
20  
21

22  
23 24. Howick J, Chalmers I, Glasziou P, et al. *The Oxford Levels of Evidence 2: Oxford Centre*  
24 for Evidence-Based Medicine; 2011 [Available from:  
25 <http://www.cebm.net/index.aspx?o=5653> accessed 26 October 2017.  
26  
27

28  
29 25. Pollock M, Fernandes RM, Hartling L. Evaluation of AMSTAR to assess the  
30 methodological quality of systematic reviews in overviews of reviews of healthcare  
31 interventions. *BMC Med Res Methodol* 2017;17(1):48. doi: 10.1186/s12874-017-0325-5  
32  
33

34  
35 26. Ioannidis JP. The mass production of pedundant, misleading, and conflicted systematic  
36 reviews and meta-analyses. *Milbank Q* 2016;94(3):485-514. doi: 10.1111/1468-0009.12210  
37  
38 [published Online First: 2016/09/14]  
39  
40

41  
42 27. Pieper D, Antoine SL, Neugebauer EA, et al. Up-to-dateness of reviews is often neglected  
43 in overviews: a systematic review. *J Clin Epidemiol* 2014;67(12):1302-8. doi:  
44 10.1016/j.jclinepi.2014.08.008 [published Online First: 2014/10/05]  
45  
46  
47  
48

**Supplementary File 1 Proposed search strategies (EMBASE)**

|    |                                                                                                                                            |
|----|--------------------------------------------------------------------------------------------------------------------------------------------|
| 1  | neoplasm\$.mp. or exp neoplasms/                                                                                                           |
| 2  | cancer.mp.                                                                                                                                 |
| 3  | 1 or 2                                                                                                                                     |
| 4  | drug therapy.mp. or exp drug therapy/                                                                                                      |
| 5  | biologic therapy.mp. or exp biologic therapy/                                                                                              |
| 6  | 4 or 5                                                                                                                                     |
| 7  | (ae or si or to or co).fs.                                                                                                                 |
| 8  | (safe or safety).ti,ab.                                                                                                                    |
| 9  | side effect\$.ti,ab.                                                                                                                       |
| 10 | ((adverse or undesirable or harm\$ or serious or toxic) adj3 (effect\$ or reaction\$ or event\$ or outcome\$)).ti,ab.                      |
| 11 | exp adverse drug reaction/                                                                                                                 |
| 12 | exp drug toxicity/                                                                                                                         |
| 13 | exp intoxication/                                                                                                                          |
| 14 | exp drug safety/                                                                                                                           |
| 15 | exp drug monitoring/                                                                                                                       |
| 16 | exp drug hypersensitivity/                                                                                                                 |
| 17 | exp postmarketing surveillance/                                                                                                            |
| 18 | exp drug surveillance program/                                                                                                             |
| 19 | exp phase iv clinical trial/                                                                                                               |
| 20 | (toxicity or complication\$ or noxious or tolerability).ti,ab.                                                                             |
| 21 | exp postoperative complication/                                                                                                            |
| 22 | exp perioperative complication/                                                                                                            |
| 23 | or/7-22                                                                                                                                    |
| 24 | exp review/                                                                                                                                |
| 25 | (literature adj3 review\$).ti,ab.                                                                                                          |
| 26 | exp meta analysis/                                                                                                                         |
| 27 | exp "Systematic Review"/                                                                                                                   |
| 28 | or/24-27                                                                                                                                   |
| 29 | (medline or medlars or embase or pubmed or cinahl or amed or psychlit or psyclit or psychinfo or psycinfo or scisearch or cochrane).ti,ab. |
| 30 | RETRACTED ARTICLE/                                                                                                                         |
| 31 | 29 or 30                                                                                                                                   |
| 32 | 28 and 31                                                                                                                                  |
| 33 | (systematic\$ adj2 (review\$ or overview)).ti,ab.                                                                                          |
| 34 | (meta?anal\$ or meta anal\$ or meta-anal\$ or metaanal\$ or metanal\$).ti,ab.                                                              |
| 35 | 32 or 33 or 34                                                                                                                             |
| 36 | 3 and 6 and 23 and 35                                                                                                                      |
| 37 | 36 not (conference abstract or conference paper or editorial).pt.                                                                          |
| 38 | limit 37 to (human and english language and yr="1883-2016")                                                                                |

**PRISMA-P (preferred reporting items for systematic review and meta-analysis protocols) 2015 checklist: recommended items to address in a systematic review protocol\***

| Section and topic                 | Item No. | Checklist item                                                                                                                                                                                                                | Yes                                 | No                                  |
|-----------------------------------|----------|-------------------------------------------------------------------------------------------------------------------------------------------------------------------------------------------------------------------------------|-------------------------------------|-------------------------------------|
| <b>Administrative information</b> |          |                                                                                                                                                                                                                               |                                     |                                     |
| <b>Title:</b>                     |          |                                                                                                                                                                                                                               |                                     |                                     |
| <b>Identification</b>             | 1a       | Identify the report as a protocol of a systematic review                                                                                                                                                                      | <input checked="" type="checkbox"/> | <input type="checkbox"/>            |
| <b>Update</b>                     | 1b       | If the protocol is for an update of a previous systematic review, identify as such                                                                                                                                            | <input type="checkbox"/>            | <input checked="" type="checkbox"/> |
| <b>Registration</b>               | 2        | If registered, provide the name of the registry (such as PROSPERO) and registration number                                                                                                                                    | <input checked="" type="checkbox"/> | <input type="checkbox"/>            |
| <b>Authors:</b>                   |          |                                                                                                                                                                                                                               |                                     |                                     |
| <b>Contact</b>                    | 3a       | Provide name, institutional affiliation, e-mail address of all protocol authors; provide physical mailing address of corresponding author                                                                                     | <input checked="" type="checkbox"/> | <input type="checkbox"/>            |
| <b>Contributions</b>              | 3b       | Describe contributions of protocol authors and identify the guarantor of the review                                                                                                                                           | <input checked="" type="checkbox"/> | <input type="checkbox"/>            |
| <b>Amendments</b>                 | 4        | If the protocol represents an amendment of a previously completed or published protocol, identify as such and list changes; otherwise, state plan for documenting important protocol amendments                               | <input type="checkbox"/>            | <input checked="" type="checkbox"/> |
| <b>Support:</b>                   |          |                                                                                                                                                                                                                               |                                     |                                     |
| <b>Sources</b>                    | 5a       | Indicate sources of financial or other support for the review                                                                                                                                                                 | <input checked="" type="checkbox"/> | <input type="checkbox"/>            |
| <b>Sponsor</b>                    | 5b       | Provide name for the review funder and/or sponsor                                                                                                                                                                             | <input type="checkbox"/>            | <input checked="" type="checkbox"/> |
| <b>Role of sponsor or funder</b>  | 5c       | Describe roles of funder(s), sponsor(s), and/or institution(s), if any, in developing the protocol                                                                                                                            | <input type="checkbox"/>            | <input checked="" type="checkbox"/> |
| <b>Introduction</b>               |          |                                                                                                                                                                                                                               |                                     |                                     |
| <b>Rationale</b>                  | 6        | Describe the rationale for the review in the context of what is already known                                                                                                                                                 | <input checked="" type="checkbox"/> | <input type="checkbox"/>            |
| <b>Objectives</b>                 | 7        | Provide an explicit statement of the question(s) the review will address with reference to participants, interventions, comparators, and outcomes (PICO)                                                                      | <input checked="" type="checkbox"/> | <input type="checkbox"/>            |
| <b>Methods</b>                    |          |                                                                                                                                                                                                                               |                                     |                                     |
| <b>Eligibility criteria</b>       | 8        | Specify the study characteristics (such as PICO, study design, setting, time frame) and report characteristics (such as years considered, language, publication status) to be used as criteria for eligibility for the review | <input checked="" type="checkbox"/> | <input type="checkbox"/>            |

|                                           |     |                                                                                                                                                                                                                                                           |                                     |                                     |
|-------------------------------------------|-----|-----------------------------------------------------------------------------------------------------------------------------------------------------------------------------------------------------------------------------------------------------------|-------------------------------------|-------------------------------------|
| <b>Information sources</b>                | 9   | Describe all intended information sources (such as electronic databases, contact with study authors, trial registers or other grey literature sources) with planned dates of coverage                                                                     | <input checked="" type="checkbox"/> | <input type="checkbox"/>            |
| <b>Search strategy</b>                    | 10  | Present draft of search strategy to be used for at least one electronic database, including planned limits, such that it could be repeated                                                                                                                | <input checked="" type="checkbox"/> | <input type="checkbox"/>            |
| <b>Study records:</b>                     |     |                                                                                                                                                                                                                                                           |                                     |                                     |
| <b>Data management</b>                    | 11a | Describe the mechanism(s) that will be used to manage records and data throughout the review                                                                                                                                                              | <input checked="" type="checkbox"/> | <input type="checkbox"/>            |
| <b>Selection process</b>                  | 11b | State the process that will be used for selecting studies (such as two independent reviewers) through each phase of the review (that is, screening, eligibility and inclusion in meta-analysis)                                                           | <input checked="" type="checkbox"/> | <input type="checkbox"/>            |
| <b>Data collection process</b>            | 11c | Describe planned method of extracting data from reports (such as piloting forms, done independently, in duplicate), any processes for obtaining and confirming data from investigators                                                                    | <input checked="" type="checkbox"/> | <input type="checkbox"/>            |
| <b>Data items</b>                         | 12  | List and define all variables for which data will be sought (such as PICO items, funding sources), any pre-planned data assumptions and simplifications                                                                                                   | <input checked="" type="checkbox"/> | <input type="checkbox"/>            |
| <b>Outcomes and prioritization</b>        | 13  | List and define all outcomes for which data will be sought, including prioritization of main and additional outcomes, with rationale                                                                                                                      | <input checked="" type="checkbox"/> | <input type="checkbox"/>            |
| <b>Risk of bias in individual studies</b> | 14  | Describe anticipated methods for assessing risk of bias of individual studies, including whether this will be done at the outcome or study level, or both; state how this information will be used in data synthesis                                      | <input checked="" type="checkbox"/> | <input type="checkbox"/>            |
| <b>Data synthesis</b>                     | 15a | Describe criteria under which study data will be quantitatively synthesised                                                                                                                                                                               | <input type="checkbox"/>            | <input checked="" type="checkbox"/> |
|                                           | 15b | If data are appropriate for quantitative synthesis, describe planned summary measures, methods of handling data and methods of combining data from studies, including any planned exploration of consistency (such as I <sup>2</sup> , Kendall's $\tau$ ) | <input type="checkbox"/>            | <input checked="" type="checkbox"/> |
|                                           | 15c | Describe any proposed additional analyses (such as sensitivity or subgroup analyses, meta-regression)                                                                                                                                                     | <input type="checkbox"/>            | <input checked="" type="checkbox"/> |
|                                           | 15d | If quantitative synthesis is not appropriate, describe the type of summary planned                                                                                                                                                                        | <input checked="" type="checkbox"/> | <input type="checkbox"/>            |
| <b>Meta-bias(es)</b>                      | 16  | Specify any planned assessment of meta-bias(es) (such as publication bias across studies, selective reporting within studies)                                                                                                                             | <input checked="" type="checkbox"/> | <input type="checkbox"/>            |
| <b>Confidence in cumulative evidence</b>  | 17  | Describe how the strength of the body of evidence will be assessed (such as GRADE)                                                                                                                                                                        | <input checked="" type="checkbox"/> | <input type="checkbox"/>            |

\* Adapted from Table 2 in Shamseer et al (the PRISMA-P Group). Preferred reporting items for systematic review and meta-analysis protocols (PRISMA-P) 2015: elaboration and explanation. *BMJ*, 2015;349:g7647.<sup>9</sup>

# BMJ Open

## Cardiovascular toxicity of targeted therapies for cancer: a protocol for an overview of systematic reviews

|                                 |                                                                                                                                                                                                                                                                                                                                                                                                                                                                                                                                                                                                                                                                                      |
|---------------------------------|--------------------------------------------------------------------------------------------------------------------------------------------------------------------------------------------------------------------------------------------------------------------------------------------------------------------------------------------------------------------------------------------------------------------------------------------------------------------------------------------------------------------------------------------------------------------------------------------------------------------------------------------------------------------------------------|
| Journal:                        | <i>BMJ Open</i>                                                                                                                                                                                                                                                                                                                                                                                                                                                                                                                                                                                                                                                                      |
| Manuscript ID                   | bmjopen-2017-021064.R1                                                                                                                                                                                                                                                                                                                                                                                                                                                                                                                                                                                                                                                               |
| Article Type:                   | Protocol                                                                                                                                                                                                                                                                                                                                                                                                                                                                                                                                                                                                                                                                             |
| Date Submitted by the Author:   | 07-Apr-2018                                                                                                                                                                                                                                                                                                                                                                                                                                                                                                                                                                                                                                                                          |
| Complete List of Authors:       | van Leeuwen, Marina; University of New South Wales, Centre for Big Data Research in Health<br>Luu, Steven; University of New South Wales - Randwick Campus, Centre for Big Data Research in Health<br>Gurney, Howard; Macquarie University, Faculty of Medicine and Health Sciences<br>Brown, Martin; Macquarie University Faculty of Medicine and Health Sciences<br>Webber, Kate; University of New South Wales - Randwick Campus, Prince of Wales Clinical School<br>Pearson, Sallie-Anne; University of New South Wales, Medicines Policy Research Unit<br>Hunt, Lee; Cancer Voices NSW<br>Vajdic, Claire; University of New South Wales, Centre for Big Data Research in Health |
| <b>Primary Subject Heading</b>: | Oncology                                                                                                                                                                                                                                                                                                                                                                                                                                                                                                                                                                                                                                                                             |
| Secondary Subject Heading:      | Cardiovascular medicine, Epidemiology                                                                                                                                                                                                                                                                                                                                                                                                                                                                                                                                                                                                                                                |
| Keywords:                       | Overview, Systematic review, Cancer, Targeted therapy, Antineoplastic agent, Cardiovascular toxicity                                                                                                                                                                                                                                                                                                                                                                                                                                                                                                                                                                                 |
|                                 |                                                                                                                                                                                                                                                                                                                                                                                                                                                                                                                                                                                                                                                                                      |

SCHOLARONE™  
Manuscripts



1  
2  
3  
4 **Cardiovascular toxicity of targeted therapies for cancer: a protocol for an overview of**  
5  
6 **systematic reviews**  
7

8  
9 Marina T. van Leeuwen<sup>1</sup>, Steven Luu<sup>1</sup>, Howard Gurney<sup>2</sup>, Martin R. Brown<sup>2</sup>, Kate Webber<sup>3,4</sup>,  
10  
11 Sallie-Anne Pearson<sup>1</sup>, Lee Hunt<sup>5</sup>, Claire M. Vajdic<sup>1</sup>  
12

13  
14 <sup>1</sup> Centre for Big Data Research in Health, University of New South Wales, Sydney, NSW,  
15  
16 2052, Australia.  
17

18  
19 <sup>2</sup> Faculty of Medicine and Health Science, Macquarie University, Sydney, NSW, 2109,  
20  
21 Australia.  
22

23  
24 <sup>3</sup> Department of Medical Oncology, Prince of Wales Hospital and Royal Hospital for  
25  
26 Women, Randwick, NSW, 2031, Australia.  
27

28  
29 <sup>4</sup> Prince of Wales Clinical School, University of New South Wales, Sydney, 2052, Australia.  
30  
31

32  
33 <sup>5</sup> Cancer Voices NSW, Australia.  
34  
35

36  
37 Corresponding author: Claire M. Vajdic, Centre for Big Data Research in Health, University  
38  
39 of New South Wales, Sydney, 2052, Australia; Phone +61 2 9385 1424; Fax +61 9385 3880;  
40  
41 Email [claire.vajdic@unsw.edu.au](mailto:claire.vajdic@unsw.edu.au)  
42

43  
44 Abstract (max 300): 300  
45

46  
47 Body (max 4,000): 2,101 (Rationale, Objectives, Methods, Discussion)  
48

49  
50 **Keywords:** Overview, systematic review, cancer, targeted therapy, antineoplastic agent,  
51  
52 cardiovascular toxicity  
53  
54  
55  
56  
57  
58  
59  
60

## ABSTRACT

**Introduction:** The introduction of targeted therapies for cancer has contributed to dramatic improvements in patient survival. Nevertheless, several targeted therapies have been associated with ‘off-target’ adverse effects, based on varying levels of evidence. To-date, this evidence has not been systematically synthesised. We will synthesise published systematic review evidence of cardiovascular toxicity associated with targeted cancer therapies.

**Methods and analysis:** We will include systematic reviews of randomised controlled trials and observational studies that report on cardiovascular outcomes for individual agents. We will identify systematic reviews by applying pre-developed, standardised search strategies within Embase, Medline and Cochrane Central. Two independent reviewers will identify reviews published up to 31 December 2016 using pre-defined eligibility criteria. They will resolve ambiguous cases through consensus, arbitrated by a third reviewer if required. The reviewers will extract and report data according to methodological guidelines for overviews provided by the Cochrane Collaboration, Joanna Briggs Institute and the Preferred Reporting Items for Systematic Reviews and Meta-Analysis Protocols (PRISMA-P). They will assess the quality of included reviews by applying the Assessment of Multiple Systematic Reviews (AMSTAR) tool. They will judge the quality of evidence in included reviews based on their assessment of bias and incorporation into the interpretation of findings. In synthesising the evidence, we will classify agents based on systematic review evidence of toxicity (sufficient, probable, possible, or indeterminate), for specific cardiovascular outcomes (congestive heart failure, myocardial infarction, ischemic heart disease, left ventricular ejection fraction decline, cerebrovascular disease, pulmonary embolism, thrombosis and hypertension). This will provide clinicians and patients with an accessible synthesis based on robust methodology.

1  
2  
3 **Ethics and dissemination:** Ethics approval is not required for overviews. We will conduct  
4 the study in collaboration with consumer representatives. We will submit results for peer-  
5 review publication, and disseminate them through established clinical and consumer  
6 networks.  
7  
8  
9

10  
11  
12 **Systematic review registration:** PROSPERO number CRD42017080014.  
13

## 14 **STRENGTHS AND LIMITATIONS OF THIS STUDY**

- 15  
16  
17  
18 - We will apply best-practice methodology in order to classify the cardiovascular  
19 toxicity of targeted therapies based on systematic-review evidence.  
20  
21  
22
- 23  
24 - Restriction to systematic reviews excludes newer agents for which systematic reviews  
25 have not yet been performed.  
26  
27  
28
- 29  
30 - Heterogeneity in systematic reviews, together with variable quality and completeness,  
31 prevents a quantitative synthesis of the evidence.  
32  
33
- 34  
35 - Systematic review evidence has been almost exclusively generated from RCT  
36 populations that are younger and healthier than the average, newly diagnosed cancer  
37 patient.  
38  
39
- 40  
41 - Short follow-up of the underlying RCTs may underestimate longer term  
42 cardiovascular toxicity.  
43  
44  
45  
46  
47  
48  
49  
50  
51  
52  
53  
54  
55  
56  
57  
58  
59  
60

## RATIONALE

Cancer treatment has evolved considerably over the past two decades. The introduction of targeted therapies, including small molecule inhibitors, monoclonal antibodies, hormone therapies and immunotherapies, has contributed to dramatic improvements in patient survival. Paradoxically, evidence is accumulating that some of these agents are associated with a number of off-target adverse effects, including short- and longer-term cardiovascular toxicity. These include, but are not limited to left-ventricular ejection fraction (LVEF) decline, congestive heart failure (CHF), infarction, ischemia, arrhythmias, stroke, thromboembolism and hypertension.<sup>1-3</sup> The pathogenesis of cardiovascular toxicity associated with established chemotherapeutic agents, such as anthracyclines, has been well-described, whereas that for targeted therapies is less well understood. Moreover, there are no universally accepted evidence-based guidelines for monitoring or managing potential cardiovascular toxicity in patients exposed to these agents.<sup>4 5</sup>

*Overviews* of systematic reviews (also called *umbrella reviews*) compile information from multiple systematic reviews to provide a comprehensive synthesis of evidence.<sup>6</sup>

Additionally, overviews of systematic reviews may provide a wider perspective on the heterogeneity, possible sources of bias and methodological quality of systematic reviews that may affect the credibility of evidence in a field.<sup>7</sup> There are no prior systematically conducted overviews of the cardiovascular toxicity of targeted cancer therapies. This overview will provide a comprehensive, accessible synthesis with which to inform clinicians in general practice and oncology when managing the cardiovascular health of cancer patients.

## OBJECTIVES

We will synthesise published systematic review evidence of cardiovascular toxicity associated with targeted cancer therapies. For each agent for which there is systematic review evidence, cardiovascular toxicity will be classified as sufficient, probable, possible or indeterminate.

## METHODS AND ANALYSIS

### Protocol and registration

This protocol was designed in accordance with the methodological guidelines for overviews provided by the Cochrane Collaboration,<sup>6</sup> the Joanna Briggs Institute,<sup>8</sup> and the Preferred Reporting Items for Systematic Reviews and Meta-Analysis Protocols (PRISMA-P; checklist provided).<sup>9</sup> It is registered on the International Prospective Register of Systematic Reviews (PROSPERO # CRD42017080014 ; <http://www.crd.york.ac.uk/prospero>).<sup>10 11</sup>

### Eligibility criteria

#### Types of studies

We will include published, peer-reviewed systematic reviews and meta-analyses of Phase II-III randomised controlled trials (RCTs) and observational cohort studies of targeted therapies for cancer which provide meta-estimates for cardiovascular outcomes. We will not include systematic reviews published only in abstract form, nor network meta-analyses. We will include pooled analyses if the study was a systematic review, and collected individual-level data from all eligible studies.

#### Population

1  
2  
3 We will limit our overview to studies of human cancer patients and will exclude treatment for  
4 other indications. We will not restrict studies by cancer type, patient age or gender.  
5  
6  
7

## 8 Interventions

9

10  
11 Our definition of targeted therapies will include: small molecule inhibitors (protein kinase,  
12 proteasome and other small molecule inhibitors); monoclonal antibodies; hormone  
13 (endocrine) therapies; and immunotherapies included within the L01X, L02B and L04AX  
14 rubrics of the World Health Organisation (WHO) Anatomical Therapeutic Chemical (ATC)  
15 classification. This system classifies agents according to the primary therapeutic use of the  
16 main active ingredient.<sup>12</sup> We will not include sensitizers used in photodynamic/radiation  
17 therapy (photodynamic agents). We will include agents administered in both neoadjuvant and  
18 adjuvant settings. We will restrict, where possible, to studies of patients undergoing first-line  
19 therapy; we will exclude studies solely examining second-line therapy. Systematic reviews  
20 consisting solely of second-line therapy trials, in particular multiple, small trials, were judged  
21 to be at high risk of non-random distribution of prior treatments to the trial arms, and thus  
22 potentially biased results.  
23  
24  
25  
26  
27  
28  
29  
30  
31  
32  
33  
34  
35  
36  
37

## 38 Comparison

39

40  
41 We will limit our overview to systematic reviews that compare the agent of interest to  
42 placebo, with or without concurrent chemotherapy, radiotherapy, surgery, or transplantation.  
43  
44 We will exclude systematic reviews with one or more studies in which the agent of interest  
45 was directly compared to standard therapy, or in which the agent of interest was given in both  
46 the treatment and control arm.  
47  
48  
49  
50  
51

## 52 Outcomes

53  
54  
55  
56  
57  
58  
59  
60

1  
2  
3 We will include systematic reviews reporting meta-estimates for at least one cardiovascular  
4 outcome. We will consider all relevant diseases of the cardiovascular system, as defined  
5 according to the WHO International Classification of Diseases 10<sup>th</sup> Revision (ICD10)<sup>13</sup> (ICD-  
6 10 codes I10-I99), including, but not limited to: CHF, myocardial infarction, ischaemic heart  
7 disease, LVEF decline, cerebrovascular disease, pulmonary embolism, thrombosis and  
8 hypertension. We will not include haematological toxicities such as thrombocytopenia.  
9  
10  
11  
12  
13  
14  
15

### 16 **Information sources and search strategy**

17  
18  
19 We will conduct an exhaustive literature search across two biomedical citation databases,  
20 Embase and Medline, as well as the Cochrane Database of Systematic Reviews. Our  
21 proposed search strategy is based on predefined systematic review search filters provided by  
22 the BMJ Evidence Centre<sup>14</sup> and was developed with the aid of an experienced research  
23 librarian. Search terms comprise keywords related to cancer, drug therapy, adverse events,  
24 toxicity, systematic reviews, and meta-analyses. We will adapt the search strategy for each  
25 database (see Supplementary File 1). English language articles published up until 31  
26 December 2016 will be eligible. We will identify any additional reviews by searching  
27 reference lists. The search strategies were first applied on 1 May 2017 and the study is  
28 expected to conclude on 30 June 2018.  
29  
30  
31  
32  
33  
34  
35  
36  
37  
38  
39  
40  
41

### 42 **Data collection**

43  
44  
45 We will manage identified studies using EndNote X8.0.1 [Thomson Reuters 2016]. After  
46 initial duplicate removal, two reviewers (SL and CV) will independently screen titles and  
47 abstracts against eligibility criteria. They will retrieve studies that are potentially relevant in  
48 full-text format and will again check them against eligibility criteria to determine inclusion.  
49  
50  
51  
52  
53  
54 They will resolve discrepancies in included studies through discussion and consultation with  
55  
56  
57  
58  
59  
60

1  
2  
3 a third reviewer (MvL) if consensus cannot be reached. They will summarise search results  
4 using a PRISMA flow diagram.<sup>15</sup>  
5  
6

7  
8 Two reviewers (SL, CV) will independently extract data from each included study using a  
9 predefined data extraction form, resolving discrepancies through discussion and consultation  
10 with a third reviewer (MvL) if consensus cannot be reached. They will pilot this form and  
11 refine accordingly. Where data reported within systematic reviews are inconsistent, they will  
12 contact the authors directly for clarification; they will exclude systematic reviews with data  
13 irregularities that cannot be resolved by communication with the authors.  
14  
15  
16  
17  
18  
19

20  
21  
22 The reviewers will extract the following data items from each included study:  
23

- 24  
25 (1) Bibliographic details (author, publication year);  
26  
27
- 28 (2) Methodological characteristics (information sources, search end date, study design  
29 and aim, eligibility criteria, publication date range of included studies, agent and dose,  
30 intervention, defined cardiovascular outcome including grade [severity], length of  
31 follow-up, method of pooling and bias assessment, funding);  
32  
33  
34  
35  
36
- 37 (3) Patient characteristics (age, sex, cancer or tumour type, prophylaxis);  
38  
39
- 40 (4) Results (number of studies included in meta-estimate, event rate in exposed and  
41 unexposed trial arms or patient populations, meta-estimate, risk of bias within  
42 included studies, risk of bias in meta-estimate);  
43  
44  
45  
46

#### 47 48 **Assessment of methodological quality of included reviews** 49

50  
51 Two reviewers (SL, CV) will independently appraise the methodological quality of included  
52 reviews using AMSTAR,<sup>16 17</sup> a validated and reliable tool.<sup>18</sup> They will resolve discrepancies  
53 in AMSTAR scores through discussion and consultation with a third reviewer (MvL) if  
54  
55  
56  
57  
58  
59



1  
2  
3 consensus cannot be reached. They will not exclude studies based on their AMSTAR score;  
4  
5 however, we will use AMSTAR scores when preparing our evidence synthesis to select the  
6  
7 higher-quality study from completely overlapping systematic reviews, rather than double-  
8  
9 counting events and participants from primary studies (see 'Data Synthesis').  
10

### 11 12 **Assessment of quality of evidence**

13  
14  
15 There is no agreed method with which to evaluate the quality of evidence across systematic  
16  
17 reviews.<sup>19</sup> The GRADE system, as applied in Cochrane reviews,<sup>6</sup> to assess the quality of  
18  
19 evidence and strength of recommendations cannot be readily applied in overviews of  
20  
21 systematic reviews.<sup>19,20</sup> Additionally, given the scope of this overview, it is not feasible to  
22  
23 judge the quality of every primary study included in each systematic review. Nevertheless,  
24  
25 the strict criteria on which we will base our synthesis will ensure that only those systematic  
26  
27 reviews with detailed reporting on the quality of primary studies contribute to the evidence  
28  
29 (see 'Data Synthesis').<sup>19</sup>  
30  
31

### 32 33 **Data synthesis**

34  
35  
36 We will consider the issue of overlapping primary studies prior to preparing our evidence  
37  
38 synthesis. If there are multiple systematic reviews of the same agent in the same patient  
39  
40 population, and for the same outcome, we will apply the following:  
41  
42

- 43  
44 - if the primary studies are completely overlapping, then we will select the highest  
45  
46 quality review;
- 47  
48 - if the primary studies partially overlap, then we will retain both reviews if the lower-  
49  
50 quality review consists of more than one-third new studies;
- 51  
52 - if the primary studies do not overlap, then we will retain both reviews.  
53  
54  
55  
56  
57  
58  
59  
60

1  
2  
3 In our overview data summary tables we will denote systematic reviews containing  
4 overlapping primary studies using appropriate footnotes; likewise, we will explicitly note  
5 systematic reviews removed from our evidence synthesis due to completely overlapping  
6 studies. We will discuss the potential impact of these exclusions when reporting the evidence  
7 synthesis.  
8  
9  
10  
11  
12

13  
14 We will use forest plots to display published meta-estimates for each agent and  
15 cardiovascular outcome; however, we will not compute an overview meta-estimate due the  
16 likelihood of considerable heterogeneity in study populations and cardiovascular outcomes  
17 between studies, the absence of essential meta-data (number of events, number of exposed  
18 and unexposed patients), and the lack of well-established quantification methods.<sup>18</sup>  
19  
20  
21  
22  
23  
24  
25

26 We will present the findings as a narrative synthesis,<sup>21</sup> and will use a ‘stop-light indicator’<sup>8</sup>  
27 for visualisation. For each cardiovascular outcome, we will classify individual agents into  
28 one of five categories based on the ‘worst-case’ scenario across published reviews by  
29 applying the criteria described in Table 1. We will classify agents as having sufficient (red),  
30 probable (orange), or possible (yellow) evidence of toxicity, sufficient evidence of no toxicity  
31 (white), or indeterminate (grey) evidence of toxicity. We will consider evidence to be  
32 sufficient if a systematic review is of high quality, assesses the quality of the primary studies,  
33 and identifies a statistically significant association based on at least 1,000 exposed patients.<sup>22</sup>  
34  
35  
36  
37  
38  
39  
40  
41  
42

43 <sup>23</sup> For each cardiovascular outcome, sufficient systematic review evidence of cardiovascular  
44 toxicity will supersede any other classification.  
45  
46  
47  
48  
49  
50  
51  
52  
53  
54  
55  
56  
57  
58  
59  
60

**Table 1. Classification used to synthesise evidence from systematic reviews of targeted cancer therapies and cardiovascular toxicity**

| Classification for each cardiovascular event            | Conditions                                                                                                                                                                                                                                                                                                                                                      |
|---------------------------------------------------------|-----------------------------------------------------------------------------------------------------------------------------------------------------------------------------------------------------------------------------------------------------------------------------------------------------------------------------------------------------------------|
| Sufficient systematic review evidence of toxicity       | If the following were <i>all</i> met:<br>(i) a statistically significant meta-estimate of effect ( $p < 0.05$ );<br>(ii) the review was either high quality (AMSTAR score $\geq 8$ ) or moderate quality (AMSTAR score 4-7), provided that the AMSTAR elements 7 and 8 were met*; AND<br>(iii) the number of patients exposed to the agent was $\geq 1000$ .    |
| Probable systematic review evidence of toxicity         | If the following are <i>all</i> met:<br>(i) a statistically significant meta-estimate of effect ( $p < 0.05$ );<br>(ii) the review was either high quality (AMSTAR score $\geq 8$ ) or moderate quality (AMSTAR score 4-7), provided that the AMSTAR elements 7 and 8 were met*; AND<br>(iii) the number of patients exposed to the agent was $< 1000$ .        |
| Probable systematic review evidence of toxicity         | If the following are <i>all</i> met:<br>(i) a statistically significant meta-estimate of effect ( $p < 0.05$ );<br>(ii) the review was moderate quality (AMSTAR score 4-7), without satisfying AMSTAR elements 7 or 8*, or of low quality (AMSTAR score $\leq 3$ ); AND<br>(iii) the number of patients exposed to the agent was $\geq 1000$ .                  |
| Possible systematic review evidence of toxicity         | If the following are <i>all</i> met:<br>(i) a statistically significant meta-estimate of effect ( $p < 0.05$ );<br>(ii) review was either moderate quality (AMSTAR score 4-7), without satisfying AMSTAR elements 7 or 8*, or low quality (AMSTAR score $\leq 3$ ); AND<br>(iii) the number of patients exposed to the agent was $< 1000$ .                     |
| Sufficient systematic review evidence of no toxicity    | If the following are <i>all</i> met:<br>(i) a statistically non-significant meta-estimate of effect ( $p > 0.05$ );<br>(ii) the review was either high quality (AMSTAR score $\geq 8$ ) or moderate quality (AMSTAR score 4-7), provided that the AMSTAR elements 7 and 8 were met*; AND<br>(iii) the number of patients exposed to the agent was $\geq 1000$ . |
| Indeterminate systematic review evidence of no toxicity | If the following are <i>all</i> met:<br>(i) a statistically non-significant meta-estimate of effect ( $p > 0.05$ );<br>(ii) the review was either high quality (AMSTAR score $\geq 8$ ) or moderate quality (AMSTAR score 4-7), provided that the AMSTAR elements 7 & 8 were met*; AND<br>(iii) the number of patients exposed to the agent was $< 1000$ .      |
| Indeterminate systematic review evidence of no toxicity | If the following are <i>all</i> met:<br>(i) a statistically non-significant meta-estimate of effect ( $p > 0.05$ );<br>(ii) the review was moderate quality (AMSTAR score 4-7), without satisfying both AMSTAR elements 7 and 8*, or low quality (AMSTAR score $\leq 3$ ); AND                                                                                  |

---

(iii) the number of patients exposed to the agent was of any size.

---

Indeterminate systematic review evidence of toxicity      If the only study examining the cardiovascular outcome did not report the number of patients exposed to the agent, regardless of effect or study quality.

---

\* AMSTAR elements 7 and 8: quality of included studies was assessed, documented and used appropriately in formulating inclusions

## Patient and public involvement

We will conduct the study in collaboration with consumer representatives, including co-author Lee Hunt, who bring essential perspectives and experience to the multi-disciplinary investigative team. We will submit our findings for peer-review publication and presentation at national and international conferences. We will also disseminate our findings through established clinical networks, as well as consumer networks, using lay summaries where appropriate. Ethics approval is not required for overviews as they are based on published documents.

## DISCUSSION

This will be the first systematically conducted overview of cardiovascular toxicity associated with targeted cancer therapies. We will use robust methodology to rigorously appraise and comprehensively synthesise published systematic review evidence. Hierarchically, systematic reviews generally provide the highest level of evidence for harms associated with treatment.<sup>24</sup> However, overviews of systematic reviews present several methodological challenges that should be considered.<sup>18 19 25</sup> Firstly, using data more than once from individual primary studies without accounting for overlap may result in some primary studies being overrepresented. As recommended, we will apply *a priori* criteria to select systematic reviews when there are multiple potential candidates.<sup>21</sup>

Secondly, it is not feasible within this study to extract and assess risk of bias at the level of each individual primary study. Rather, our evidence synthesis will incorporate the quality of

1  
2  
3 systematic reviews, the number of patients exposed, whether the quality of the primary  
4 studies was assessed, and the consistency of the evidence. These strict criteria will ensure that  
5 low-quality systematic reviews that fail to assess or take into account the quality of the  
6 primary studies provide no more than indeterminate evidence in our synthesis.<sup>19 26</sup>

7  
8  
9  
10  
11  
12 Thirdly, due to heterogeneity between systematic reviews in terms of outcomes and  
13 definitions, population characteristics, and study type and quality, a quantitative synthesis of  
14 the evidence is not possible.

15  
16  
17  
18  
19 Fourthly, restriction to published systematic reviews precludes inclusion of emerging  
20 evidence, and there is no agreed method for including additional primary studies.<sup>27</sup> Hence,  
21 we are unable to include in our synthesis evidence for those agents for which systematic  
22 reviews are yet to be conducted, and it will be inherently biased towards the more established  
23 agents.

24  
25  
26  
27  
28  
29  
30  
31 Finally, despite our intention to include observational studies, evidence which is  
32 predominantly generated from RCTs may underestimate cardiovascular toxicity, as trial  
33 participants will be younger and healthier than the average cancer patient, and follow-up time  
34 may be insufficient to observe late effects. They are also unlikely to report detailed  
35 information on cardiovascular prophylaxis, such as use of angiotensin-converting enzyme  
36 (ACE) inhibitors, angiotensin receptor blockers and beta-blockers, which are known to  
37 modify cardiovascular toxicity.<sup>14</sup>

38  
39  
40  
41  
42  
43  
44  
45  
46  
47 Our evidence synthesis will provide new commentary on the current systematic review  
48 evidence for cardiovascular toxicity associated with individual targeted cancer therapies. It  
49 will provide an accessible, comprehensive synthesis with which to inform clinicians and the  
50 development of guidelines for the management of at-risk patients. Furthermore, it is expected  
51 that this overview will encourage further research for those agents for which systematic

1  
2  
3 review evidence is currently insufficient or lacking.  
4

## 5 6 **ACKNOWLEDGEMENTS**

7  
8  
9 We would like to acknowledge Monica O'Brien, Academic Services Librarian, University of  
10  
11 New South Wales, for her assistance with the proposed search strategy.  
12

## 13 14 **AUTHOR CONTRIBUTIONS**

15  
16  
17 CV is the guarantor. MvL, SL, and CV drafted the protocol. All authors have made  
18  
19 substantive intellectual contributions to the development of this protocol. MvL, SL, and CV  
20  
21 developed the search strategy. HG, KW, and S-AP provided expertise on targeted therapies  
22  
23 and MB on cardiovascular toxicity. LH contributed to the development of the stop-light  
24  
25 indicator. All authors read, provided feedback and approved the final manuscript.  
26  
27

## 28 29 **FUNDING**

30  
31  
32 MvL is supported by a Postdoctoral Fellowship from the National Health and Medical  
33  
34 Research Council (#1012141). This research received no specific grant from any funding  
35  
36 agency in the public, commercial or not-for-profit sectors.  
37  
38

## 39 40 **COMPETING INTERESTS**

41  
42  
43 The authors declare that they have no competing interests.  
44  
45  
46  
47  
48  
49  
50  
51  
52  
53  
54  
55  
56  
57  
58  
59  
60

**REFERENCES**

1. Ewer MS, Ewer SM. Cardiotoxicity of anticancer treatments. *Nat Rev Cardiol* 2015;12(9):547-58. doi: 10.1038/nrcardio.2015.65 [published Online First: 2015/05/13]
2. Herrmann J, Yang EH, Iliescu CA, et al. Vascular toxicities of cancer therapies: the old and the new - an evolving avenue. *Circulation* 2016;133(13):1272-89. doi: 10.1161/CIRCULATIONAHA.115.018347 [published Online First: 2016/03/30]
3. Moslehi JJ. Cardiovascular Toxic Effects of Targeted Cancer Therapies. *N Engl J Med* 2016;375(15):1457-67. doi: 10.1056/NEJMra1100265 [published Online First: 2016/10/13]
4. O'Hare M, Murphy K, Mookadam F, et al. Cardio-oncology Part II: the monitoring, prevention, detection and treatment of chemotherapeutic cardiac toxicity. *Expert Rev Cardiovasc Ther* 2015;13(5):519-27. doi: 10.1586/14779072.2015.1027686 [published Online First: 2015/04/14]
5. Hamo CE, Bloom MW, Cardinale D, et al. Cancer therapy-related cardiac dysfunction and heart failure: Part 2: prevention, treatment, guidelines, and future directions. *Circ Heart Fail* 2016;9(2):e002843. doi: 10.1161/CIRCHEARTFAILURE.115.002843 [published Online First: 2016/02/04]
6. Becker LA, Oxman AD. Chapter 22: Overviews of reviews. In: Higgins J, Green S, eds. *Cochrane Handbook for Systematic Reviews of Interventions* Version 5.10 [updated March 2011] The Cochrane Collaboration, 2011.
7. Ioannidis J. Next-generation systematic reviews: prospective meta-analysis, individual-level data, networks and umbrella reviews. *Br J Sports Med* 2017;51(20):1456-58. doi: 10.1136/bjsports-2017-097621 [published Online First: 2017/02/23]

- 1  
2  
3 8. Aromataris E, Fernandez R, Godfrey CM, et al. Summarizing systematic reviews:  
4 methodological development, conduct and reporting of an umbrella review approach.  
5 International Journal of Evidence-Based Healthcare 2015;13(3):132-40. doi:  
6  
7 10.1097/xeb.000000000000055  
8  
9  
10  
11  
12 9. Shamseer L, Moher D, Clarke M, et al. Preferred reporting items for systematic review and  
13 meta-analysis protocols (PRISMA-P) 2015: elaboration and explanation. BMJ 2015;350 doi:  
14 10.1136/bmj.g7647  
15  
16  
17  
18  
19 10. Booth A, Clarke M, Dooley G, et al. The nuts and bolts of PROSPERO: an international  
20 prospective register of systematic reviews. Syst Rev 2012;1(1):2. doi: 10.1186/2046-4053-1-  
21 2  
22  
23  
24  
25  
26  
27 11. Booth A, Clarke M, Ghersi D, et al. An international registry of systematic-review  
28 protocols. Lancet 2011;377(9760):108-9. doi: 10.1016/S0140-6736(10)60903-8  
29  
30  
31  
32  
33 12. World Health Organisation (WHO) Collaborating Centre for Drug Statistics and  
34 Methodology. Guidelines for ATC classification and DDD assignment, 2017 Oslo, Norway.  
35 2016 [Available from:  
36  
37 [https://www.whocc.no/filearchive/publications/2017\\_guidelines\\_web.pdf](https://www.whocc.no/filearchive/publications/2017_guidelines_web.pdf)] accessed 12  
38  
39  
40  
41  
42  
43  
44 13. World Health Organization (WHO). International Statistical Classification of Diseases  
45 and Related Health Problems, 10th Revision (online) Geneva: World Health Organization;  
46 2016 [Available from: <http://apps.who.int/classifications/icd10/browse/2016/en/#/>] accessed  
47  
48  
49  
50  
51  
52  
53  
54 14. BMJ Evidence Centre. BMJ Clinical Evidence: Systematic Review Search Filter  
55  
56  
57  
58  
59  
60



1  
2  
3 [http://clinicalevidence.bmj.com/x/set/static/ebm/learn/665076.html?locale=en\\_AU](http://clinicalevidence.bmj.com/x/set/static/ebm/learn/665076.html?locale=en_AU) accessed  
4  
5 12 September 2017.  
6  
7

8 15. Moher D, Liberati A, Tetzlaff J, et al. Preferred reporting items for systematic reviews  
9  
10 and meta-analyses: the PRISMA statement. *BMJ* 2009;339:b2535. doi: 10.1136/bmj.b2535  
11  
12

13 16. Shea BJ, Hamel C, Wells GA, et al. AMSTAR is a reliable and valid measurement tool to  
14  
15 assess the methodological quality of systematic reviews. *J Clin Epidemiol* 2009;62(10):1013-  
16  
17 20. doi: <http://dx.doi.org/10.1016/j.jclinepi.2008.10.009>  
18  
19

20 17. Shea BJ, Grimshaw JM, Wells GA, et al. Development of AMSTAR: a measurement tool  
21  
22 to assess the methodological quality of systematic reviews. *BMC Med Res Methodol*  
23  
24 2007;7(1):10. doi: 10.1186/1471-2288-7-10  
25  
26  
27

28 18. Pieper D, Buechter R, Jerinic P, et al. Overviews of reviews often have limited rigor: a  
29  
30 systematic review. *J Clin Epidemiol* 2012;65(12):1267-73. doi:  
31  
32 10.1016/j.jclinepi.2012.06.015  
33  
34

35 19. Ballard M, Montgomery P. Risk of bias in overviews of reviews: a scoping review of  
36  
37 methodological guidance and four-item checklist. *Res Synth Methods* 2017;8(1):92-108. doi:  
38  
39 10.1002/jrsm.1229  
40  
41  
42

43 20. Pollock A, Campbell P, Brunton G, et al. Selecting and implementing overview methods:  
44  
45 implications from five exemplar overviews. *Syst Rev* 2017;6(1):145. doi: 10.1186/s13643-  
46  
47 017-0534-3  
48  
49

50 21. Cochrane Comparing Multiple Interventions Methods Group (CMIMG). Review type and  
51  
52 methodological considerations- background paper for the first part of the Paris CMIMG  
53  
54 Discussion 2012 [Available from:  
55  
56  
57  
58  
59  
60

1  
2  
3 [http://methods.cochrane.org/sites/methods.cochrane.org.cmi/files/public/uploads/Review%20](http://methods.cochrane.org/sites/methods.cochrane.org.cmi/files/public/uploads/Review%20type%20and%20methods%20for%20comparing%20multiple%20interventions_12APR12.pdf)  
4 [type%20and%20methods%20for%20comparing%20multiple%20interventions\\_12APR12.pdf](http://methods.cochrane.org/sites/methods.cochrane.org.cmi/files/public/uploads/Review%20type%20and%20methods%20for%20comparing%20multiple%20interventions_12APR12.pdf)  
5  
6 ] accessed 17 October 2017.  
7  
8  
9

10 22. Bellou V, Belbasis L, Tzoulaki I, et al. Environmental risk factors and Parkinson's  
11 disease: An umbrella review of meta-analyses. *Parkinsonism Relat Disord* 2016;23:1-9. doi:  
12 10.1016/j.parkreldis.2015.12.008 [published Online First: 2016/01/08]  
13  
14

15 23. Belbasis L, Bellou V, Evangelou E, et al. Environmental risk factors and multiple  
16 sclerosis: an umbrella review of systematic reviews and meta-analyses. *Lancet Neurol*  
17 2015;14(3):263-73. doi: 10.1016/S1474-4422(14)70267-4 [published Online First:  
18 2015/02/11]  
19  
20  
21  
22  
23  
24  
25

26 24. Howick J, Chalmers I, Glasziou P, et al. *The Oxford Levels of Evidence 2: Oxford Centre*  
27 *for Evidence-Based Medicine*; 2011 [Available from:  
28 <http://www.cebm.net/index.aspx?o=5653>] accessed 26 October 2017.  
29  
30  
31  
32  
33

34 25. Pollock M, Fernandes RM, Hartling L. Evaluation of AMSTAR to assess the  
35 methodological quality of systematic reviews in overviews of reviews of healthcare  
36 interventions. *BMC Med Res Methodol* 2017;17(1):48. doi: 10.1186/s12874-017-0325-5  
37  
38  
39  
40  
41

42 26. Ioannidis JP. The mass production of pedundant, misleading, and conflicted systematic  
43 reviews and meta-analyses. *Milbank Q* 2016;94(3):485-514. doi: 10.1111/1468-0009.12210  
44  
45 [published Online First: 2016/09/14]  
46  
47  
48

49 27. Pieper D, Antoine SL, Neugebauer EA, et al. Up-to-dateness of reviews is often neglected  
50 in overviews: a systematic review. *J Clin Epidemiol* 2014;67(12):1302-8. doi:  
51 10.1016/j.jclinepi.2014.08.008 [published Online First: 2014/10/05]  
52  
53  
54  
55  
56  
57  
58  
59  
60

**Supplementary File 1 Proposed search strategies (EMBASE)**

|    |                                                                                                                                             |
|----|---------------------------------------------------------------------------------------------------------------------------------------------|
| 1  | neoplasm\$.mp. or exp neoplasms/                                                                                                            |
| 2  | cancer.mp.                                                                                                                                  |
| 3  | 1 or 2                                                                                                                                      |
| 4  | drug therapy.mp. or exp drug therapy/                                                                                                       |
| 5  | biologic therapy.mp. or exp biologic therapy/                                                                                               |
| 6  | 4 or 5                                                                                                                                      |
| 7  | (ae or si or to or co).fs.                                                                                                                  |
| 8  | (safe or safety).ti,ab.                                                                                                                     |
| 9  | side effect\$.ti,ab.                                                                                                                        |
| 10 | ((adverse or undesirable or harm\$ or serious or toxic) adj3 (effect\$ or reaction\$ or event\$ or outcome\$)).ti,ab.                       |
| 11 | exp adverse drug reaction/                                                                                                                  |
| 12 | exp drug toxicity/                                                                                                                          |
| 13 | exp intoxication/                                                                                                                           |
| 14 | exp drug safety/                                                                                                                            |
| 15 | exp drug monitoring/                                                                                                                        |
| 16 | exp drug hypersensitivity/                                                                                                                  |
| 17 | exp postmarketing surveillance/                                                                                                             |
| 18 | exp drug surveillance program/                                                                                                              |
| 19 | exp phase iv clinical trial/                                                                                                                |
| 20 | (toxicity or complication\$ or noxious or tolerability).ti,ab.                                                                              |
| 21 | exp postoperative complication/                                                                                                             |
| 22 | exp perioperative complication/                                                                                                             |
| 23 | or/7-22                                                                                                                                     |
| 24 | exp review/                                                                                                                                 |
| 25 | (literature adj3 review\$).ti,ab.                                                                                                           |
| 26 | exp meta analysis/                                                                                                                          |
| 27 | exp "Systematic Review"/                                                                                                                    |
| 28 | or/24-27                                                                                                                                    |
| 29 | (medline or medlars or embase or pubmed or cinahl or amed or psychlit or psychlit or psychinfo or psycinfo or scisearch or cochrane).ti,ab. |
| 30 | RETRACTED ARTICLE/                                                                                                                          |
| 31 | 29 or 30                                                                                                                                    |
| 32 | 28 and 31                                                                                                                                   |
| 33 | (systematic\$ adj2 (review\$ or overview)).ti,ab.                                                                                           |
| 34 | (meta?anal\$ or meta anal\$ or meta-anal\$ or metaanal\$ or metanal\$).ti,ab.                                                               |
| 35 | 32 or 33 or 34                                                                                                                              |
| 36 | 3 and 6 and 23 and 35                                                                                                                       |
| 37 | 36 not (conference abstract or conference paper or editorial).pt.                                                                           |
| 38 | limit 37 to (human and english language and yr="1883-2016")                                                                                 |

PRISMA-P (preferred reporting items for systematic review and meta-analysis protocols) 2015 checklist: recommended items to address in a systematic review protocol\*

| Section and topic                 | Item No. | Checklist item                                                                                                                                                                                  | Yes                                 | No                                  | Page         |
|-----------------------------------|----------|-------------------------------------------------------------------------------------------------------------------------------------------------------------------------------------------------|-------------------------------------|-------------------------------------|--------------|
| <b>Administrative information</b> |          |                                                                                                                                                                                                 |                                     |                                     |              |
| <b>Title:</b>                     |          |                                                                                                                                                                                                 |                                     |                                     |              |
| <b>Identification</b>             | 1a       | Identify the report as a protocol of a systematic review                                                                                                                                        | <input checked="" type="checkbox"/> | <input type="checkbox"/>            | 1            |
| <b>Update</b>                     | 1b       | If the protocol is for an update of a previous systematic review, identify as such                                                                                                              | <input type="checkbox"/>            | <input checked="" type="checkbox"/> | n/a          |
| <b>Registration</b>               | 2        | If registered, provide the name of the registry (such as PROSPERO) and registration number                                                                                                      | <input checked="" type="checkbox"/> | <input type="checkbox"/>            | 3            |
| <b>Authors:</b>                   |          |                                                                                                                                                                                                 |                                     |                                     |              |
| <b>Contact</b>                    | 3a       | Provide name, institutional affiliation, e-mail address of all protocol authors; provide physical mailing address of corresponding author                                                       | <input checked="" type="checkbox"/> | <input type="checkbox"/>            | 1 and online |
| <b>Contributions</b>              | 3b       | Describe contributions of protocol authors and identify the guarantor of the review                                                                                                             | <input checked="" type="checkbox"/> | <input type="checkbox"/>            | 14           |
| <b>Amendments</b>                 | 4        | If the protocol represents an amendment of a previously completed or published protocol, identify as such and list changes; otherwise, state plan for documenting important protocol amendments | <input type="checkbox"/>            | <input checked="" type="checkbox"/> | n/a          |
| <b>Support:</b>                   |          |                                                                                                                                                                                                 |                                     |                                     |              |
| <b>Sources</b>                    | 5a       | Indicate sources of financial or other support for the review                                                                                                                                   | <input checked="" type="checkbox"/> | <input type="checkbox"/>            | 14           |
| <b>Sponsor</b>                    | 5b       | Provide name for the review funder and/or sponsor                                                                                                                                               | <input type="checkbox"/>            | <input checked="" type="checkbox"/> | n/a          |
| <b>Role of sponsor or funder</b>  | 5c       | Describe roles of funder(s), sponsor(s), and/or institution(s), if any, in developing the protocol                                                                                              | <input type="checkbox"/>            | <input checked="" type="checkbox"/> | 14           |
| <b>Introduction</b>               |          |                                                                                                                                                                                                 |                                     |                                     |              |
| <b>Rationale</b>                  | 6        | Describe the rationale for the review in the context of what is already known                                                                                                                   | <input checked="" type="checkbox"/> | <input type="checkbox"/>            | 4            |

|                                           |     |                                                                                                                                                                                                                               |                                     |                                     |                  |
|-------------------------------------------|-----|-------------------------------------------------------------------------------------------------------------------------------------------------------------------------------------------------------------------------------|-------------------------------------|-------------------------------------|------------------|
| <b>Objectives</b>                         | 7   | Provide an explicit statement of the question(s) the review will address with reference to participants, interventions, comparators, and outcomes (PICO)                                                                      | <input checked="" type="checkbox"/> | <input type="checkbox"/>            | 5-7              |
| <b>Methods</b>                            |     |                                                                                                                                                                                                                               |                                     |                                     |                  |
| <b>Eligibility criteria</b>               | 8   | Specify the study characteristics (such as PICO, study design, setting, time frame) and report characteristics (such as years considered, language, publication status) to be used as criteria for eligibility for the review | <input checked="" type="checkbox"/> | <input type="checkbox"/>            | 5-7              |
| <b>Information sources</b>                | 9   | Describe all intended information sources (such as electronic databases, contact with study authors, trial registers or other grey literature sources) with planned dates of coverage                                         | <input checked="" type="checkbox"/> | <input type="checkbox"/>            | 7                |
| <b>Search strategy</b>                    | 10  | Present draft of search strategy to be used for at least one electronic database, including planned limits, such that it could be repeated                                                                                    | <input checked="" type="checkbox"/> | <input type="checkbox"/>            | 7 and supplement |
| <b>Study records:</b>                     |     |                                                                                                                                                                                                                               |                                     |                                     |                  |
| <b>Data management</b>                    | 11a | Describe the mechanism(s) that will be used to manage records and data throughout the review                                                                                                                                  | <input checked="" type="checkbox"/> | <input type="checkbox"/>            | 7                |
| <b>Selection process</b>                  | 11b | State the process that will be used for selecting studies (such as two independent reviewers) through each phase of the review (that is, screening, eligibility and inclusion in meta-analysis)                               | <input checked="" type="checkbox"/> | <input type="checkbox"/>            | 7-8              |
| <b>Data collection process</b>            | 11c | Describe planned method of extracting data from reports (such as piloting forms, done independently, in duplicate), any processes for obtaining and confirming data from investigators                                        | <input checked="" type="checkbox"/> | <input type="checkbox"/>            | 7-8              |
| <b>Data items</b>                         | 12  | List and define all variables for which data will be sought (such as PICO items, funding sources), any pre-planned data assumptions and simplifications                                                                       | <input checked="" type="checkbox"/> | <input type="checkbox"/>            | 8                |
| <b>Outcomes and prioritization</b>        | 13  | List and define all outcomes for which data will be sought, including prioritization of main and additional outcomes, with rationale                                                                                          | <input checked="" type="checkbox"/> | <input type="checkbox"/>            | 6-7              |
| <b>Risk of bias in individual studies</b> | 14  | Describe anticipated methods for assessing risk of bias of individual studies, including whether this will be done at the outcome or study level, or both; state how this information will be used in data synthesis          | <input checked="" type="checkbox"/> | <input type="checkbox"/>            | 8-10             |
| <b>Data synthesis</b>                     | 15a | Describe criteria under which study data will be quantitatively synthesised                                                                                                                                                   | <input type="checkbox"/>            | <input checked="" type="checkbox"/> | n/a              |

|                                          |     |                                                                                                                                                                                                                                                           |                                     |                                     |      |
|------------------------------------------|-----|-----------------------------------------------------------------------------------------------------------------------------------------------------------------------------------------------------------------------------------------------------------|-------------------------------------|-------------------------------------|------|
|                                          | 15b | If data are appropriate for quantitative synthesis, describe planned summary measures, methods of handling data and methods of combining data from studies, including any planned exploration of consistency (such as I <sup>2</sup> , Kendall's $\tau$ ) | <input type="checkbox"/>            | <input checked="" type="checkbox"/> | n/a  |
|                                          | 15c | Describe any proposed additional analyses (such as sensitivity or subgroup analyses, meta-regression)                                                                                                                                                     | <input type="checkbox"/>            | <input checked="" type="checkbox"/> | n/a  |
|                                          | 15d | If quantitative synthesis is not appropriate, describe the type of summary planned                                                                                                                                                                        | <input checked="" type="checkbox"/> | <input type="checkbox"/>            | 9-10 |
| <b>Meta-bias(es)</b>                     | 16  | Specify any planned assessment of meta-bias(es) (such as publication bias across studies, selective reporting within studies)                                                                                                                             | <input checked="" type="checkbox"/> | <input type="checkbox"/>            | 8    |
| <b>Confidence in cumulative evidence</b> | 17  | Describe how the strength of the body of evidence will be assessed (such as GRADE)                                                                                                                                                                        | <input checked="" type="checkbox"/> | <input type="checkbox"/>            | 10   |

\* Adapted from Table 2 in Shamseer et al (the PRISMA-P Group). Preferred reporting items for systematic review and meta-analysis protocols (PRISMA-P) 2015: elaboration and explanation. *BMJ*, 2015;349:g7647.<sup>9</sup>
