# Supplementary material for: Cardiovascular toxicity of targeted therapies for cancer: a protocol for an overview of systematic reviews
Source: PubMed Central journal article supplement — BMJ Open. 2018 Jun 27;8(6):e021064. doi: 10.1136/bmjopen-2017-021064 (PMC6042572; doi:10.1136/bmjopen-2017-021064), 2018-06-27
Supplement: bmjopen-2017-021064supp001.pdf [file bmjopen-2017-021064supp001.pdf]

**Supplementary File 1      Proposed search strategies (EMBASE)**

|    |                                                                                                                                            |
|----|--------------------------------------------------------------------------------------------------------------------------------------------|
| 1  | neoplasm\$.mp. or exp neoplasms/                                                                                                           |
| 2  | cancer.mp.                                                                                                                                 |
| 3  | 1 or 2                                                                                                                                     |
| 4  | drug therapy.mp. or exp drug therapy/                                                                                                      |
| 5  | biologic therapy.mp. or exp biologic therapy/                                                                                              |
| 6  | 4 or 5                                                                                                                                     |
| 7  | (ae or si or to or co).fs.                                                                                                                 |
| 8  | (safe or safety).ti,ab.                                                                                                                    |
| 9  | side effect\$.ti,ab.                                                                                                                       |
| 10 | ((adverse or undesirable or harm\$ or serious or toxic) adj3 (effect\$ or reaction\$ or event\$ or outcome\$)).ti,ab.                      |
| 11 | exp adverse drug reaction/                                                                                                                 |
| 12 | exp drug toxicity/                                                                                                                         |
| 13 | exp intoxication/                                                                                                                          |
| 14 | exp drug safety/                                                                                                                           |
| 15 | exp drug monitoring/                                                                                                                       |
| 16 | exp drug hypersensitivity/                                                                                                                 |
| 17 | exp postmarketing surveillance/                                                                                                            |
| 18 | exp drug surveillance program/                                                                                                             |
| 19 | exp phase iv clinical trial/                                                                                                               |
| 20 | (toxicity or complication\$ or noxious or tolerability).ti,ab.                                                                             |
| 21 | exp postoperative complication/                                                                                                            |
| 22 | exp perioperative complication/                                                                                                            |
| 23 | or/7-22                                                                                                                                    |
| 24 | exp review/                                                                                                                                |
| 25 | (literature adj3 review\$).ti,ab.                                                                                                          |
| 26 | exp meta analysis/                                                                                                                         |
| 27 | exp "Systematic Review"/                                                                                                                   |
| 28 | or/24-27                                                                                                                                   |
| 29 | (medline or medlars or embase or pubmed or cinahl or amed or psychlit or psyqlit or psychinfo or psycinfo or scisearch or cochrane).ti,ab. |
| 30 | RETRACTED ARTICLE/                                                                                                                         |
| 31 | 29 or 30                                                                                                                                   |
| 32 | 28 and 31                                                                                                                                  |
| 33 | (systematic\$ adj2 (review\$ or overview)).ti,ab.                                                                                          |
| 34 | (meta?anal\$ or meta anal\$ or meta-anal\$ or metaanal\$ or metanal\$).ti,ab.                                                              |
| 35 | 32 or 33 or 34                                                                                                                             |
| 36 | 3 and 6 and 23 and 35                                                                                                                      |
| 37 | 36 not (conference abstract or conference paper or editorial).pt.                                                                          |
| 38 | limit 37 to (human and english language and yr="1883-2016")                                                                                |
